# Supplementary material
Source: publisher figshare collection journal article supplement (https://acs.figshare.com/ndownloader/files/21732666)
Supplement: Supplementary file 1 [file 21732666]

## **Supporting Information**

### **Sequential Intra-Intercellular Delivery of Nanomedicine for Deep Drug-Resistant Solid Tumor Penetration**

Yuchu He<sup>1</sup>, Cong Cong<sup>1</sup>, Lei Li<sup>1</sup>, Liyao Luo<sup>1</sup>, Yaqian He<sup>1</sup>, Zining Hao<sup>1</sup>,

Dawei Gao<sup>1\*</sup>

1. State Key Laboratory of Metastable Materials Science and Technology, Applying Chemistry Key Lab of Hebei Province, Hebei Key Laboratory of Heavy Metal Deep-remediation in Water and Resource Reuse, Yanshan University, Qinhuangdao, 066004, P. R. China.

\*Corresponding author: Prof. Dawei Gao, Tel: (+86)13930338376

E-mail: [dwgao@ysu.edu.cn](mailto:dwgao@ysu.edu.cn)

## Experimental Section

Immunohistochemical assay. For CD31 and Ki67 immunostaining, antigen retrieval was performed using discovery CC1 solution (Ventana) at 95°C (pH 8.5). The primary antibody of Ki67 (MAB-0672, Maixin. Bio, Fujian, China) was incubated for 32 min at 37 °C with a dilution of 1:100. Following staining, sections were observed using a microscope to obtain the proliferation index (percentage of Ki67-positive cells from the total cells). Three fields with the highest density of immunolabeled tumor cell nuclei (“hot-spot”) were assessed per tumor at 10× magnification. The procedure for CD31 staining was similar to that for Ki67 staining. The anti-CD31 primary antibody (MAB-0672, Maixin. Bio, Fujian, China) was used.

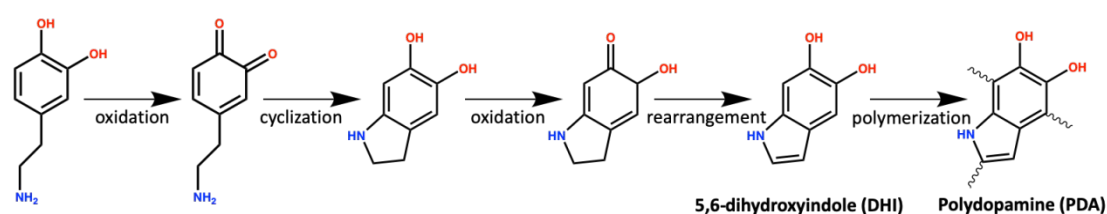

**Figure S1.** Polymeric mechanism of DA to PDA (DHI is treated as the primary molecular in the polymerization).

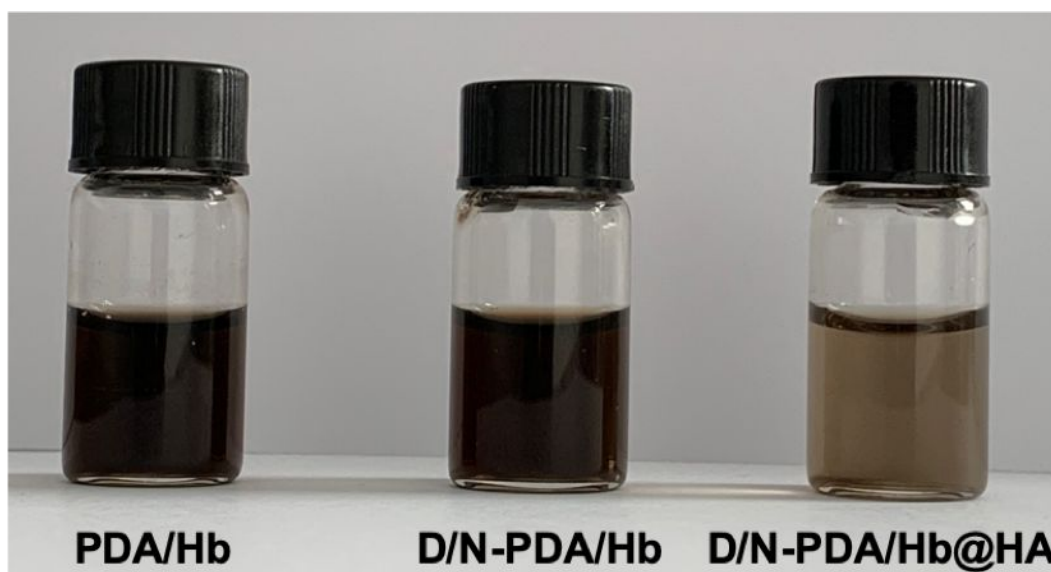

**Figure S2.** Photographs of PDA/Hb, D/N-PDA/Hb and D/N-PDA/Hb@HA

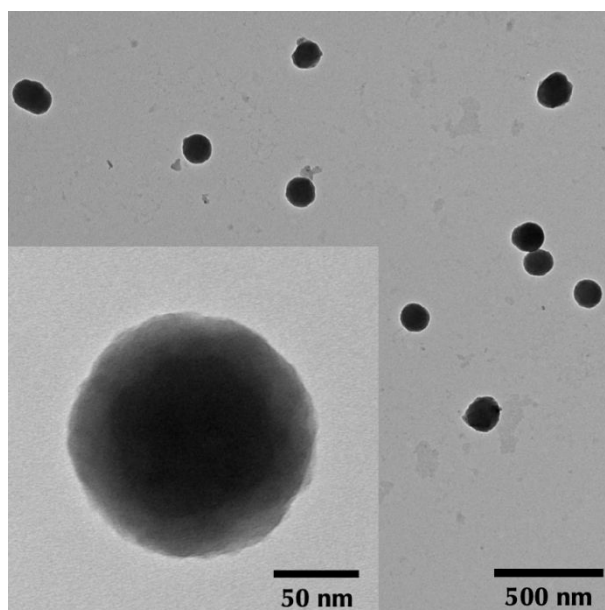

**Figure S3.** TEM images of D/N-PDA/Hb@HA.

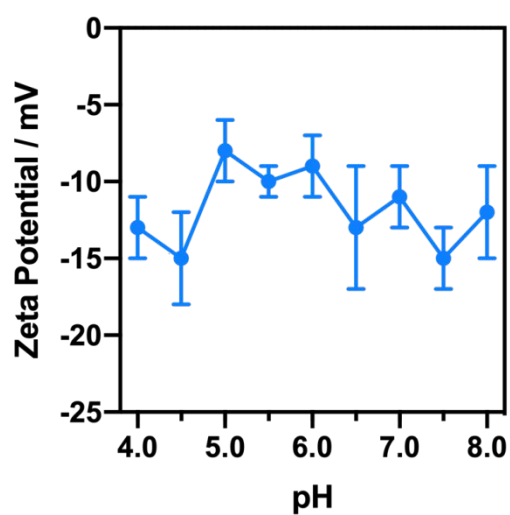

**Figure S4.** Zeta potentials of D/N-PDA/Hb@HA in the conditions with different pH values.

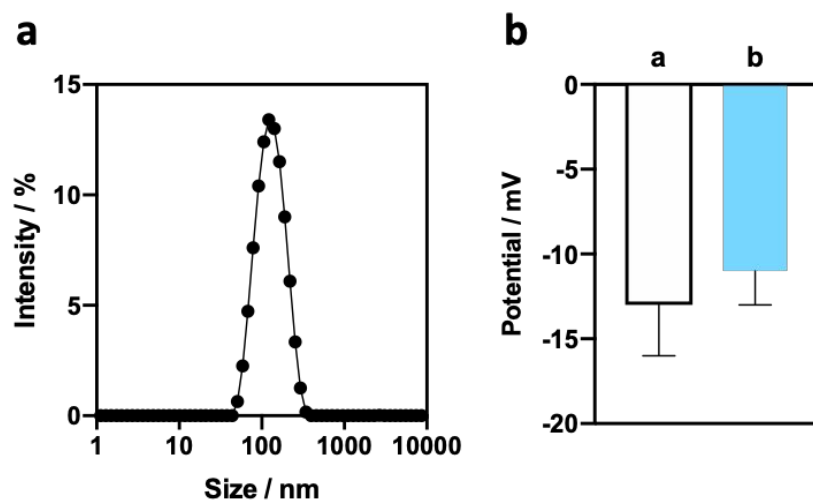

**Figure S5.** (a) Size distribution of D/N-PDA@HA. (b) Zeta potentials of (a) D/N-PDA@HA and (b) D/N-PDA/Hb@HA.

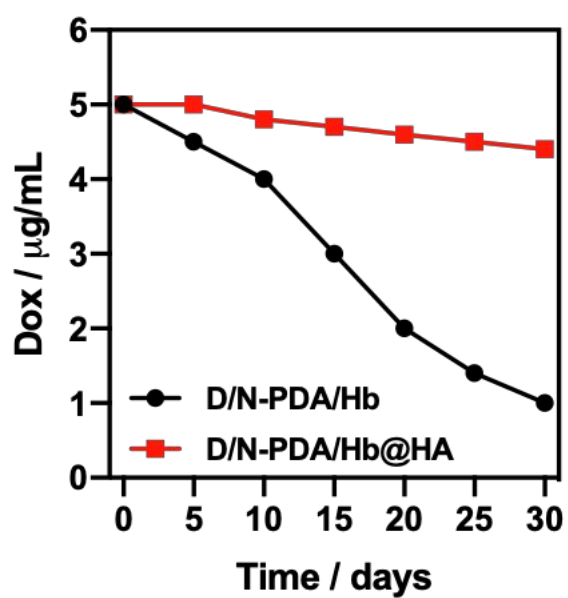

**Figure S6.** Dox leakage of D/N-PDA/Hb and D/N-PDA/Hb@HA at room temperature for 30 days.

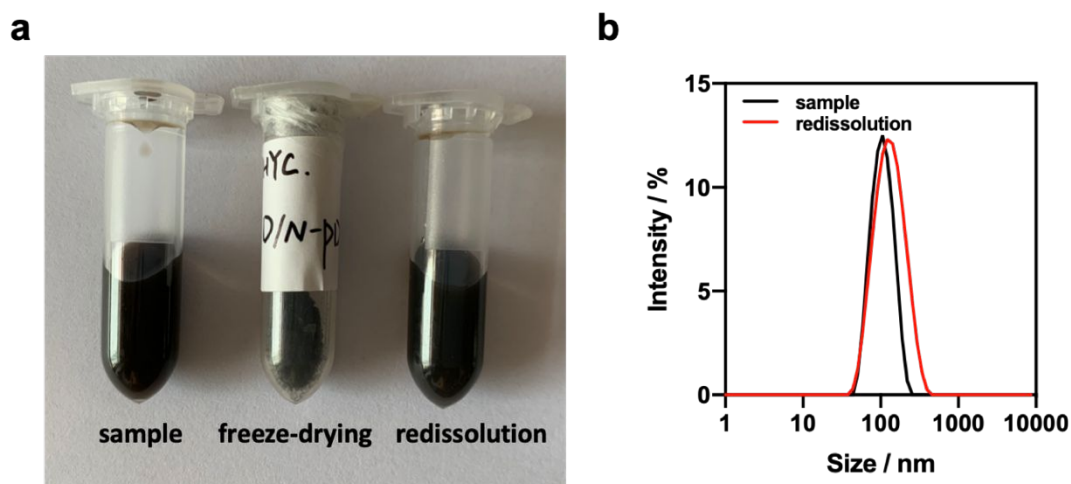

**Figure S7.** (a) Photographs of freeze-dried powder of D/N-PDA/Hb@HA (sample) and D/N-PDA/Hb@HA with freeze-drying and redissolution. (b) Size distribution of D/N-PDA/Hb@HA and D/N-PDA/Hb@HA with redissolution.

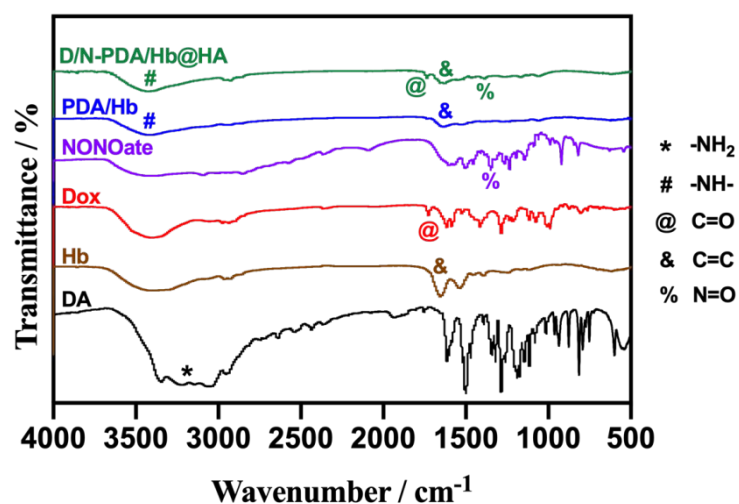

**Figure S8.** FTIR analysis of DA, Hb, Dox, NONOate, PDA/Hb and D/N-PDA/Hb@HA.

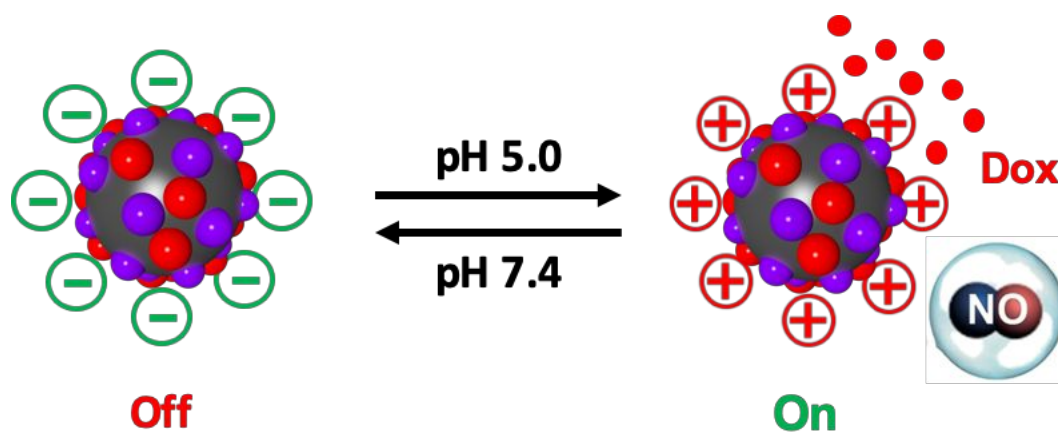

**Figure S9.** Schematic illustration of Dox release by electrostatic repulsion based on charge reversal and NO release in acidic environment.

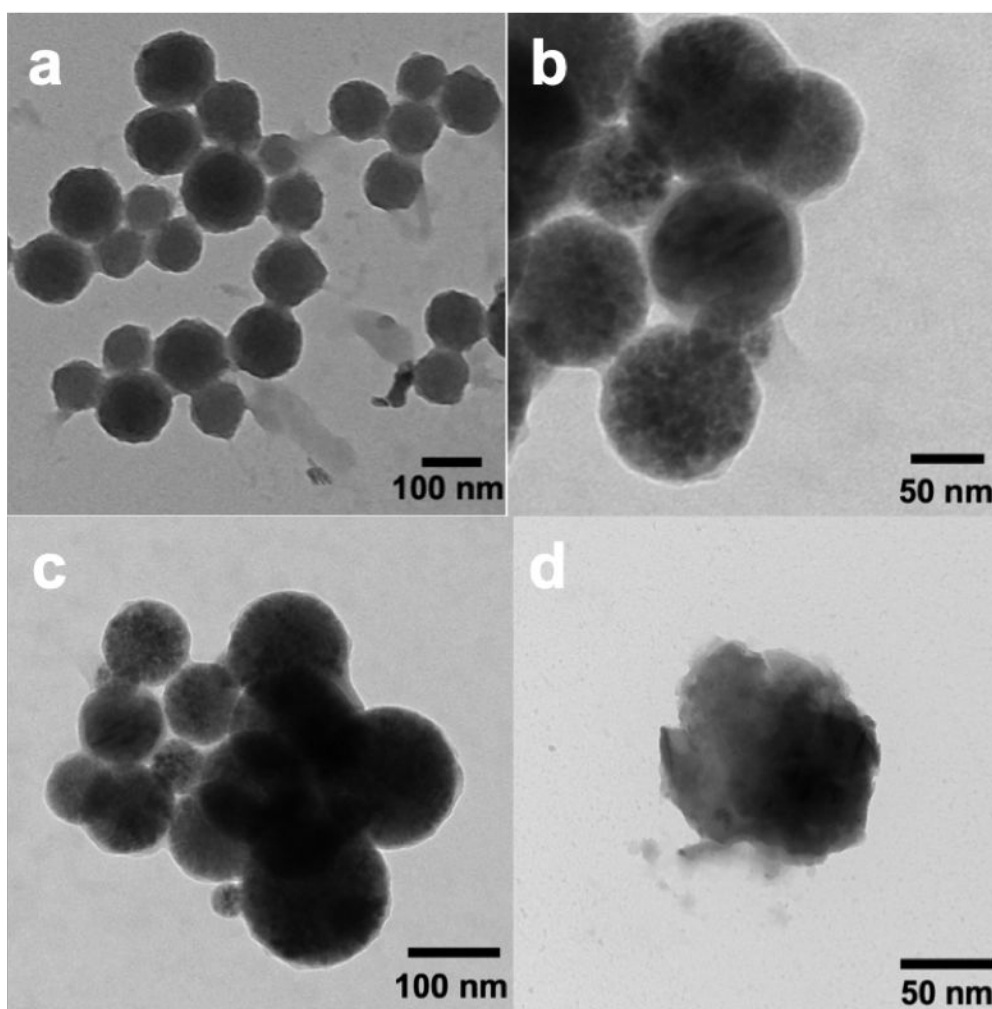

**Figure S10.** TEM images of D/N-PDA/Hb@HA in (a) pH 7.4, (b) pH 5.5 (first drug release), (c) pH 7.4 (after first drug release) and (d) pH 5.5 (second drug release).

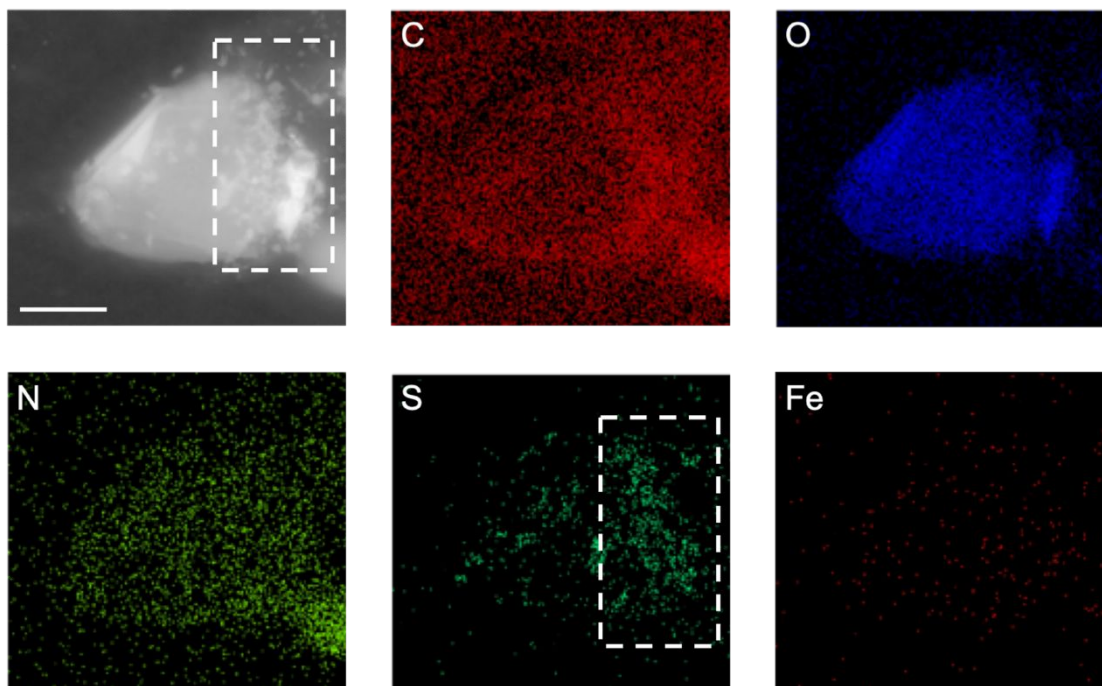

**Figure S11.** STEM and mapping images of D/N-PDA/Hb@HA with Dox and NO release in the condition of PBS (pH 5.5) (scale bar: 50 nm).

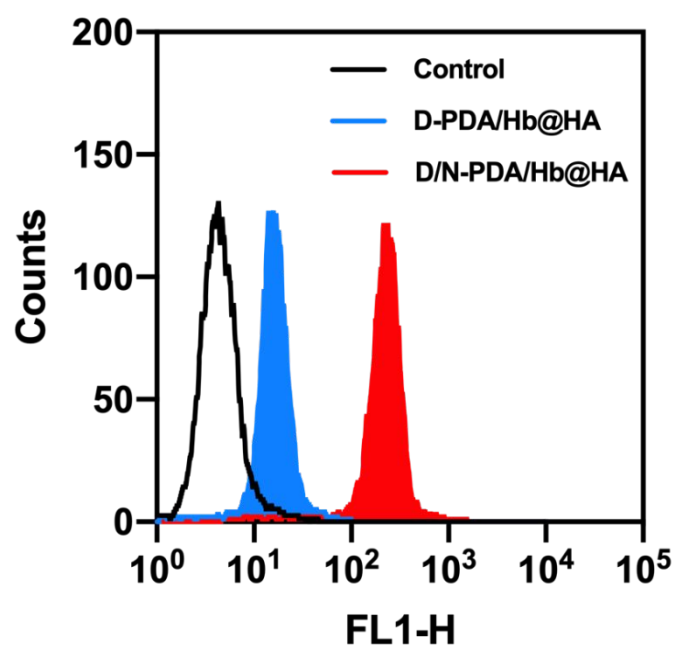

**Figure S12.** Intracellular fluorescence intensity of LysoTracker Green of PBS as control, D-PDA/Hb@HA and D/N-PDA/Hb@HA by FCM.

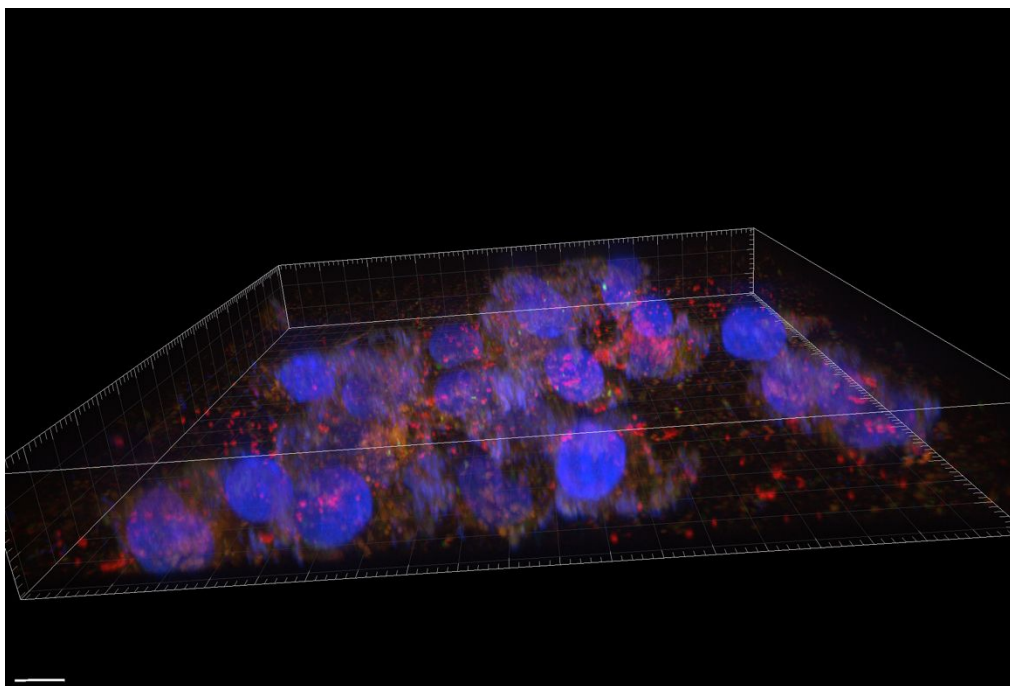

**Figure S13.** 3d image of HeLa cells treated with D/N-PDA/Hb@HA by CLSM (Blue: cell nucleus, Green: lysosome, Red: D/N-PDA/Hb@HA, Scale bar: 10  $\mu$ m).

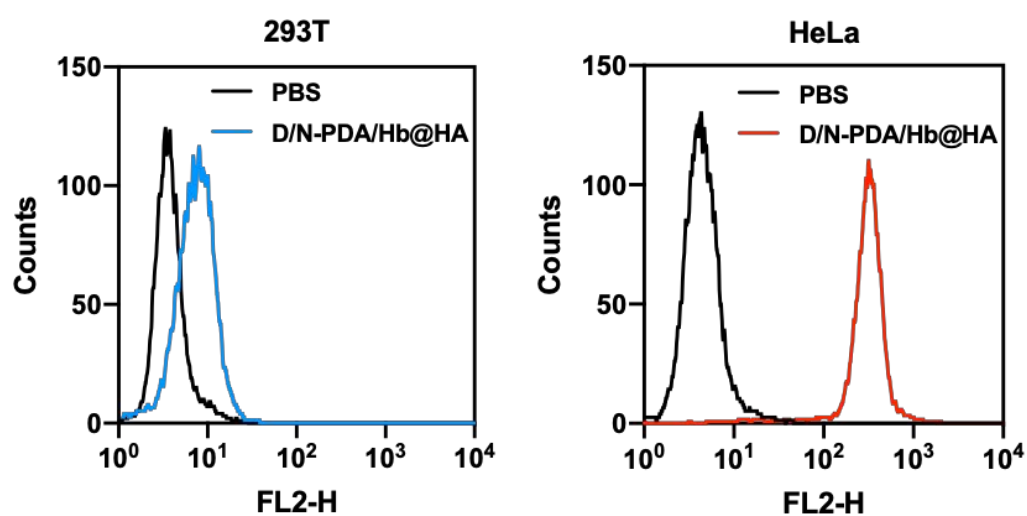

**Figure S14.** Cellular uptake of 293T and HeLa cells incubated with PBS and D/N-PDA/Hb@HA by FCM analysis.



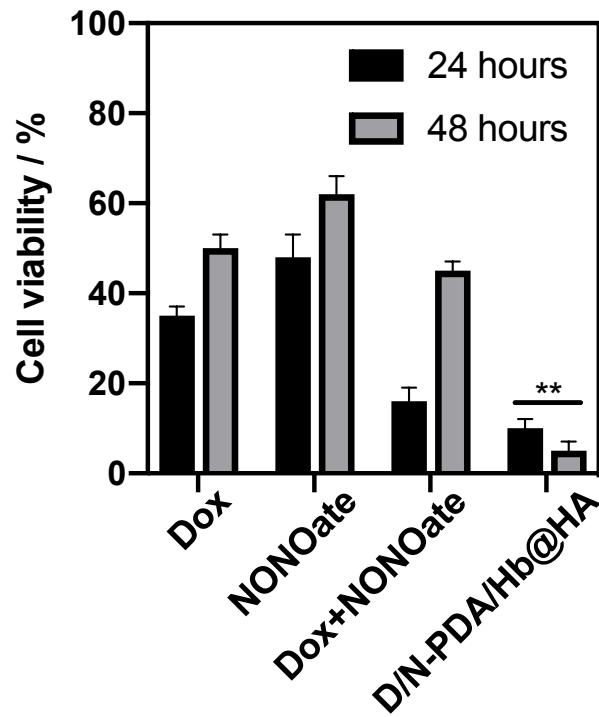

**Figure S15.** Cytotoxicity of Dox, NONOate, Dox+NONOate and D/N-PDA/Hb@HA on HeLa cells for 24 and 48 hours (\*\* $P < 0.01$  compared with Dox+NONOate).

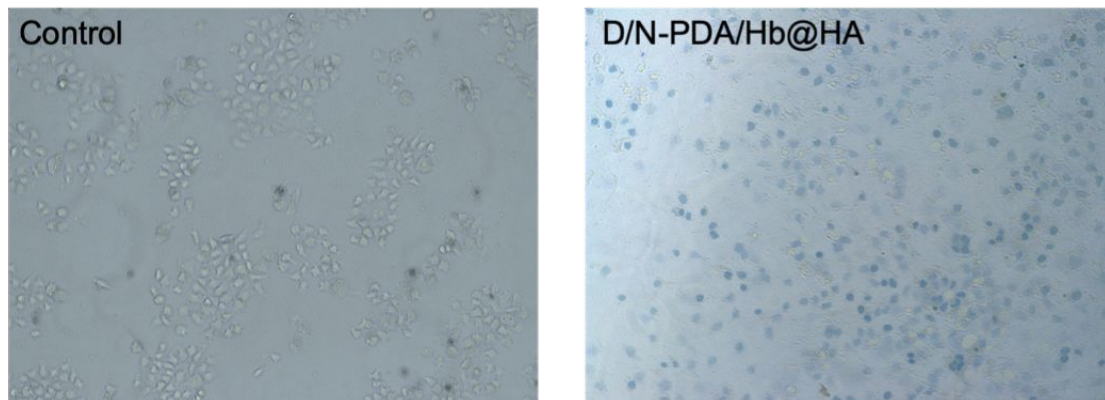

**Figure S16.** HeLa cells treated with PBS as control and D/N-PDA/Hb@HA by trypan blue staining.

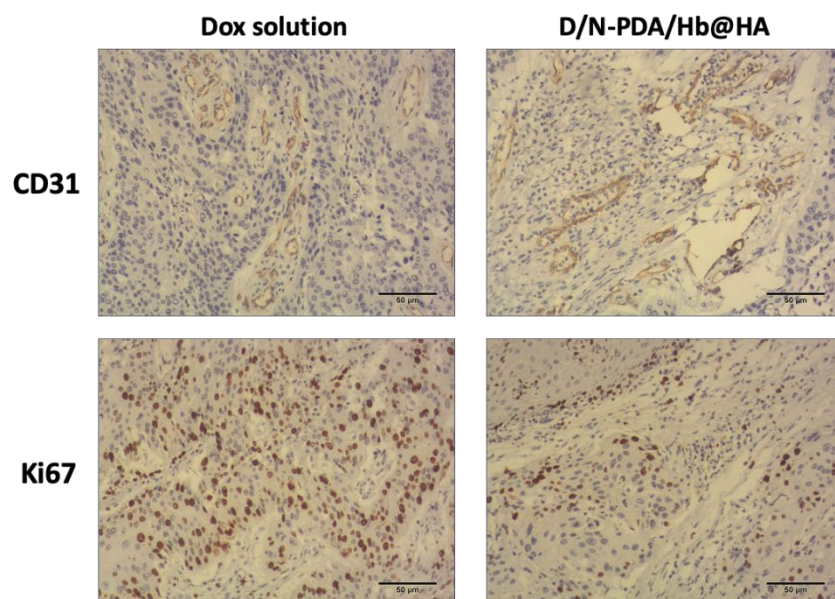

**Figure S17.** The expression of CD31 (blood vessels) and Ki67 (tumors) of in Dox solution and D/N-PDA/Hb@HA groups using immunohistochemical staining.

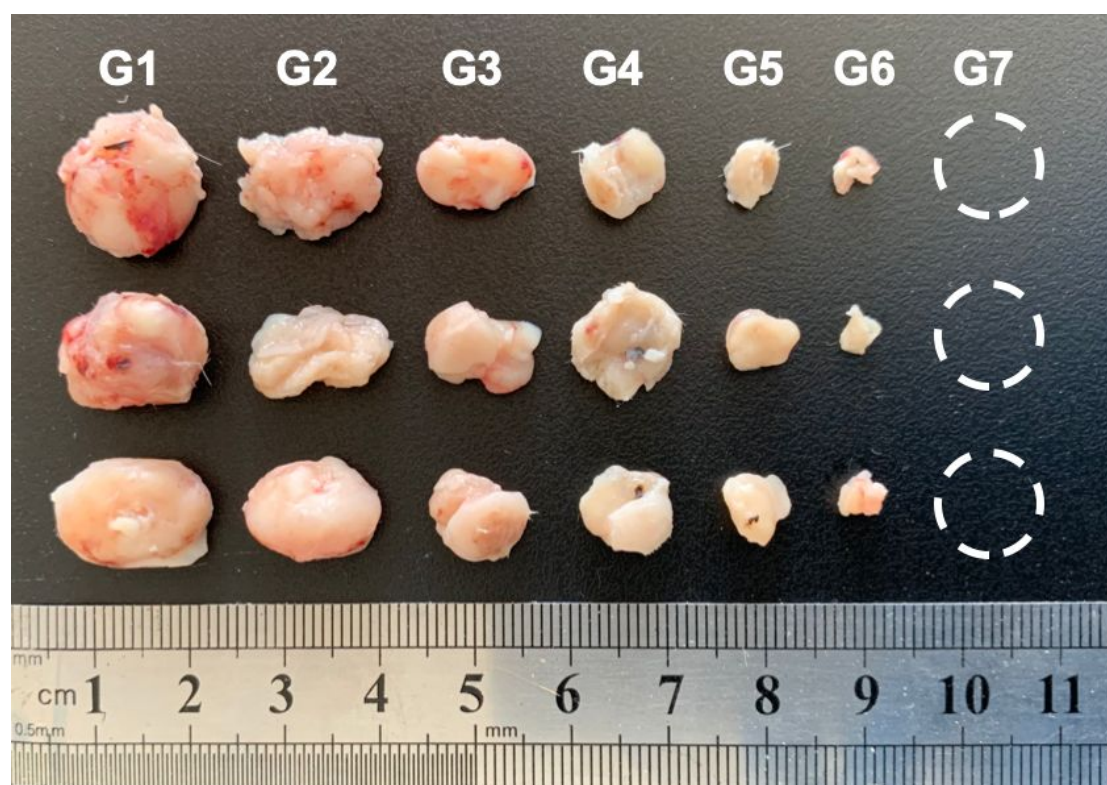

**Figure S18.** Tumor photographs of the mice treated with all tested formulations (Group 1: saline, 2: PDA/Hb, 3: Dox, 4: NONOate, 5: D/N-PDA@HA, 6: D/N-PDA/Hb and 7: D/N-PDA/Hb@HA).

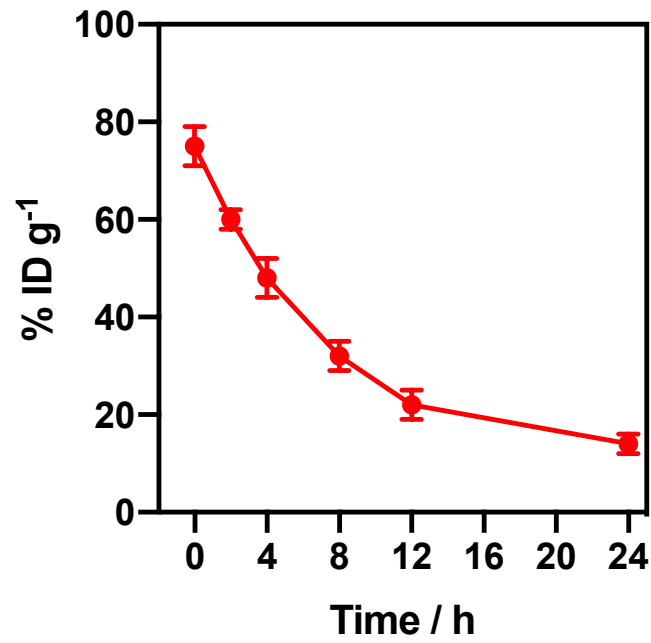

**Figure S19.** Blood circulation of D/N-PDA/Hb@HA after i.v. injection (%ID g<sup>-1</sup> is the percentage of Dox counts per gram of tissue injected).

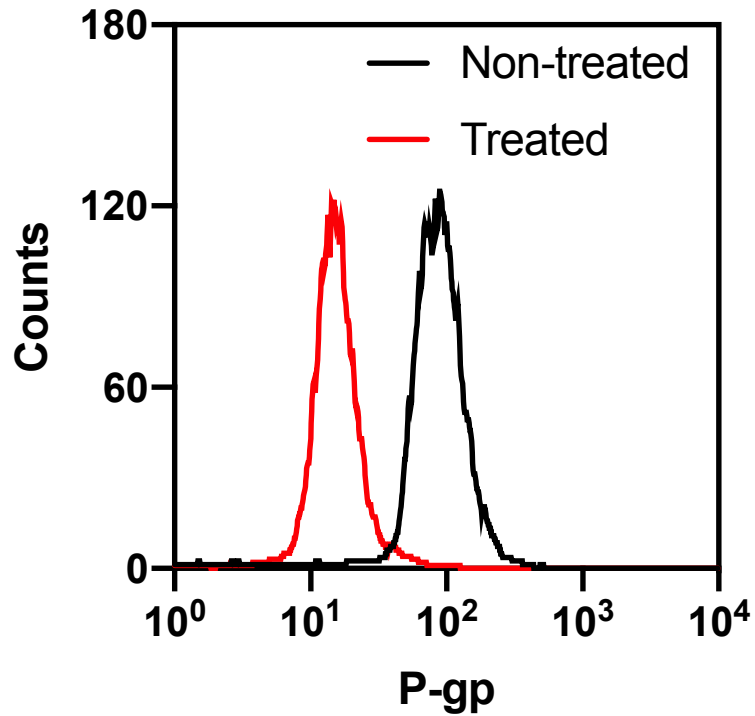

**Figure S20.** P-gp expression analysis by FCM in treated mice (D/N-PDA/Hb@HA) and non-treated mice.

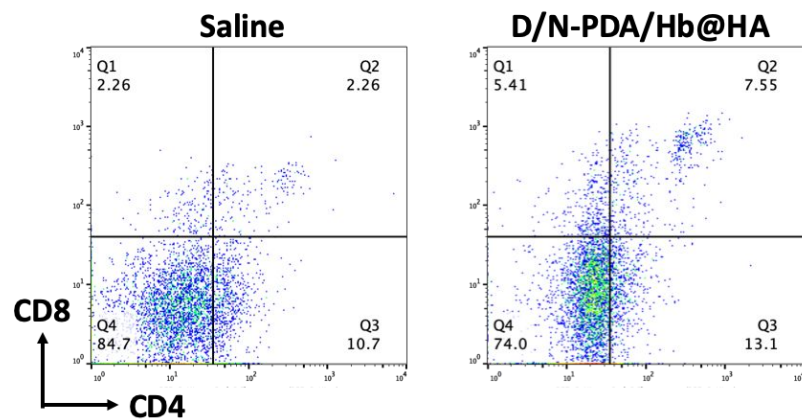

**Figure S21.** Quantification of CD4 and CD8 T cells in tumors treated with saline and D/N-PDA/Hb@HA.

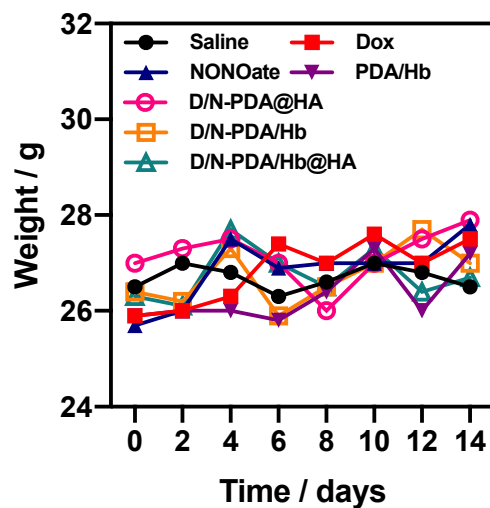

**Figure S22.** Body weight changes of different groups in the therapeutic period.
